# Supplementary material for: Increased Dietary Intakes of Total Protein, Animal Protein and White Meat Protein Were Associated with Reduced Bone Loss—A Prospective Analysis Based on Guangzhou Health and Nutrition Cohort, South China
Source: MDPI journal article supplement (doi:10.3390/nu15061432), 2023-03-16
Supplement: s1 [file s1]

## Supplemental Tables

**Supplemental Table S1. Dietary amino acids intake at 1<sup>st</sup> follow-up (2011 to 2013) by quartiles of total protein intakes, Guangzhou Nutrition and Health Study (n=1987).**

| Dietary amino acids intakes,<br>mg·kg <sup>-1</sup> ·d <sup>-1</sup> | Dietary total protein intakes (g·kg <sup>-1</sup> ·d <sup>-1</sup> ) |             |             |             | Total       | <i>P</i> |
|----------------------------------------------------------------------|----------------------------------------------------------------------|-------------|-------------|-------------|-------------|----------|
|                                                                      | Q1(<0.96)                                                            | Q2(0.96~ )  | Q3(1.10~ )  | Q4(≥1.26)   |             |          |
| n                                                                    | 497                                                                  | 497         | 497         | 496         | 1987        |          |
| Isoleucine                                                           | 37.51±7.09                                                           | 42.85±8.07  | 46.62±9.16  | 53.24±11.13 | 45.05±10.65 | < 0.001  |
| Leucine                                                              | 70.09±12.89                                                          | 80.08±14.68 | 87.03±16.61 | 99.42±20.27 | 84.15±19.51 | < 0.001  |
| Lysine                                                               | 54.84±12.31                                                          | 62.96±14.03 | 68.75±16.18 | 78.88±19.43 | 66.35±17.98 | < 0.001  |
| Methionine                                                           | 19.47±3.81                                                           | 22.20±4.29  | 24.26±5.18  | 27.59±5.89  | 23.38±5.69  | < 0.001  |
| Phenylalanine                                                        | 43.46±7.29                                                           | 49.51±8.72  | 53.42±9.34  | 60.94±11.49 | 51.83±11.28 | < 0.001  |
| Threonine                                                            | 35.83±6.85                                                           | 40.99±7.71  | 44.58±8.87  | 50.92±10.80 | 43.08±10.27 | < 0.001  |
| Valine                                                               | 46.84±8.12                                                           | 55.34±9.21  | 57.77±10.50 | 65.90±12.78 | 55.96±12.41 | < 0.001  |
| Tryptophan                                                           | 11.20±2.11                                                           | 12.85±2.74  | 13.92±2.76  | 15.85±3.29  | 13.45±3.23  | < 0.001  |
| Histidine                                                            | 23.14±4.54                                                           | 26.50±5.23  | 28.87±5.78  | 33.04±7.33  | 27.88±6.84  | < 0.001  |
| Cystine                                                              | 13.60±2.36                                                           | 15.48±3.02  | 16.76±3.03  | 19.06±3.57  | 16.22±3.62  | < 0.001  |
| Sulfur Amino Acids                                                   | 32.38±5.82                                                           | 36.92±6.87  | 40.14±7.73  | 45.62±8.89  | 38.76±8.84  | < 0.001  |

Data were presented as mean ± SD for continuous variables and compared by Analysis of variance (ANOVA). Dietary amino acids intakes were estimated based on the Food Frequency Questionnaire and Chinese Food Composition Table. They were residual adjusted by adding residuals to the mean energy intake of participants. Sulfur Amino Acids= Cystine+ Methionine

**Supplemental Table S2. Changes of BMD (mg/cm<sup>2</sup>) by quartiles of dietary plant protein intakes.**

|                                 | Dietary plant protein intakes (g·kg <sup>-1</sup> ·d <sup>-1</sup> ) |              |              |              | % difference | <i>P</i> -ANCOVA | <i>P</i> trend |
|---------------------------------|----------------------------------------------------------------------|--------------|--------------|--------------|--------------|------------------|----------------|
|                                 | Q1(<0.47)                                                            | Q2 (0.47~ )  | Q3 (0.56~ )  | Q4(≥0.64)    |              |                  |                |
|                                 | n=496                                                                | n=497        | n=497        | n=497        |              |                  |                |
| BMD changes, mg/cm <sup>2</sup> |                                                                      |              |              |              |              |                  |                |
| Whole body                      |                                                                      |              |              |              |              |                  |                |
| Model I                         | -292.67±7.89                                                         | -282.48±7.48 | -285.97±7.45 | -293.79±8.08 | -0.38        | 0.669            | 0.856          |
| Model II                        | -290.37±8.39                                                         | -281.97±7.58 | -287.45±7.53 | -295.48±8.39 | -1.76        | 0.667            | 0.612          |
| Spine L1-4                      |                                                                      |              |              |              |              |                  |                |
| Model I                         | 286.29±7.29                                                          | 276.80±6.91  | 283.28±6.89  | 287.57±7.47  | 0.45         | 0.698            | 0.768          |
| Model II                        | 284.01±7.73                                                          | 275.53±6.98  | 285.03±6.93  | 288.37±7.73  | 1.54         | 0.629            | 0.549          |
| Total hip                       |                                                                      |              |              |              |              |                  |                |
| Model I                         | 0.19±11.60                                                           | -11.98±10.98 | -21.95±10.94 | -7.15±11.88  | -3863.16     | 0.553            | 0.565          |
| Model II                        | -0.97±12.30                                                          | -13.03±11.11 | -20.87±11.04 | -8.59±12.30  | -785.57      | 0.665            | 0.609          |
| Femur neck                      |                                                                      |              |              |              |              |                  |                |
| Model I                         | -436.68±7.64                                                         | -425.40±7.24 | -425.44±7.22 | -429.28±7.83 | 1.72         | 0.675            | 0.545          |
| Model II                        | -437.53±8.10                                                         | -425.19±7.31 | -424.44±7.26 | -428.69±8.10 | 2.02         | 0.621            | 0.490          |
| Trochanter                      |                                                                      |              |              |              |              |                  |                |
| Model I                         | -16.24±1.86                                                          | -14.13±1.77  | -12.81±1.76  | -14.86±1.91  | 8.50         | 0.593            | 0.541          |
| Model II                        | -17.61±1.98                                                          | -14.06±1.79  | -12.38±1.77  | -13.93±1.98  | 20.90        | 0.284            | 0.188          |

Data were presented as the adjusted mean ± standard error by General Linear Model with Q1 as reference group.

Model I was adjusted for age (y), sex (male or female) and BMI (kg/m<sup>2</sup>). Model II was further adjusted for marital status (yes or no), household income (≤ 3000, 3000-6000 or >6000 yuan · m<sup>-1</sup> · p<sup>-1</sup>), smoking status (yes or no), drinking status (yes or no), physical activity (Met · wk<sup>-1</sup>), calcium supplement use

(yes or no), multi-vitamins use (yes or no), dietary energy intake (kcal/d), dietary Vitamin D intake ( $\mu\text{g/d}$ ) and dietary calcium intake (mg/d).

Protein intakes were energy-adjusted residuals added to a constant, where the constant equals the nutrient intake for the mean energy intake of the study population. Changes of BMD =  $[(\text{BMD at 2}^{\text{nd}} \text{ follow-up} - \text{BMD at 1}^{\text{st}} \text{ follow-up}) \times 3] / \text{time interval}$ . % Difference =  $(Q4 - Q1) / \text{ABS}(Q1) * 100\%$

**Supplemental Table S3. Subgroup analyses by gender for the associations of dietary total protein intakes ( $\text{g}\cdot\text{kg}^{-1}\cdot\text{d}^{-1}$ ) with the changes of BMD ( $\text{mg}/\text{cm}^2$ ) by multivariable linear regression (n=1987).**

| Dietary protein intakes<br>( $\text{g}\cdot\text{kg}^{-1}\cdot\text{d}^{-1}$ ) | Changes of bone mineral density at whole body and different sites ( $\text{mg}/\text{cm}^2$ ) |               |                |                |              |
|--------------------------------------------------------------------------------|-----------------------------------------------------------------------------------------------|---------------|----------------|----------------|--------------|
|                                                                                | Whole body                                                                                    | Spine L1-4    | Total hip      | Femur neck     | Trochanter   |
| <b>Men (n=563)</b>                                                             |                                                                                               |               |                |                |              |
| Total protein                                                                  | -17.65±44.02                                                                                  | 2.33±39.20    | 55.40±61.60    | 43.90±41.06    | 15.03±7.32*  |
| Animal protein                                                                 | -24.85±42.52                                                                                  | -2.41±37.87   | 19.10±59.70    | 20.18±39.70    | 6.10±7.09    |
| Red-meat protein                                                               | -100.49±59.72                                                                                 | 49.69±53.27   | -55.94±83.80   | 7.90±55.90     | -7.17±9.99   |
| White-meat protein                                                             | 66.40±65.38                                                                                   | -48.29±58.24  | 151.76±92.66   | 33.04±61.08    | 19.84±10.89  |
| Milk and dairy protein                                                         | -5.73±210.04                                                                                  | -88.41±186.98 | -322.27±293.20 | 287.63±195.69  | 15.37±35.04  |
| Egg protein                                                                    | -52.43±220.02                                                                                 | -92.58±195.88 | -49.86±307.80  | -255.72±205.11 | 19.09±36.70  |
| Plant protein                                                                  | 23.37±71.03                                                                                   | 12.80±63.25   | 91.20±99.39    | 57.99±66.27    | 22.11±11.81  |
| Soy protein                                                                    | 57.18±105.46                                                                                  | -92.48±93.84  | -12.57±147.51  | 88.34±98.41    | 30.21±17.55  |
| <b>Women (n=1424)</b>                                                          |                                                                                               |               |                |                |              |
| Total protein                                                                  | -0.48±23.46                                                                                   | 11.01±21.71   | 31.52±35.01    | 75.91±22.83*** | 20.08±6.15** |
| Animal protein                                                                 | 22.28±22.62                                                                                   | -5.26±20.95   | 40.92±33.76    | 63.22±22.05**  | 14.83±5.94*  |
| Red-meat protein                                                               | 36.49±35.31                                                                                   | 1.28±32.69    | 65.95±52.76    | 17.71±34.51    | 11.76±9.29   |
| White-meat protein                                                             | 4.31±33.69                                                                                    | -15.53±31.18  | 34.81±50.28    | 102.69±32.80** | 19.73±8.85*  |
| Milk and dairy protein                                                         | 93.14±86.98                                                                                   | -32.83±80.53  | -24.76±129.77  | 66.82±85.00    | 21.49±22.90  |
| Egg protein                                                                    | -15.83±92.64                                                                                  | 57.61±85.72   | -1.95±138.29   | 85.35±90.48    | -5.89±24.38  |
| Plant protein                                                                  | -58.86±36.38                                                                                  | 40.14±33.69   | -30.04±54.39   | 19.17±35.58    | 9.96±9.58    |
| Soy protein                                                                    | -103.48±60.49                                                                                 | 67.99±56.01   | 125.94±90.37   | -84.08±59.12   | -3.73±15.94  |

Data were presented as regression coefficients ± standard error (B±SE) by multivariable linear regression. Model was adjusted for age (y), BMI ( $\text{kg}/\text{m}^2$ ),

marital status (yes or no), household income ( $\leq 3000$ , 3000-6000 or  $>6000$  yuan·m<sup>-1</sup>·p<sup>-1</sup>), smoking (yes or no), alcohol drinking (yes or no), total physical activity (Met·wk<sup>-1</sup>), calcium supplement usage (yes or no), multi-vitamin usage (yes or no), dietary energy intake (kcal/d), dietary Vitamin D intake (ug/d) and calcium intake (mg/d). Changes of BMD = [(BMD at 2nd follow-up – BMD at 1st follow-up)×3] / time interval. Additional correction of estrogen usage was made for women. \* $p < 0.05$ , \*\* $p < 0.01$ , \*\*\* $p < 0.001$

**Supplemental Table S4. Subgroup analyses by age ( $\geq$  vs.  $< 60$ y) for the associations of dietary total protein intake ( $\text{g}\cdot\text{kg}^{-1}\cdot\text{d}^{-1}$ ) and BMD changes ( $\text{mg}/\text{cm}^2$ ) by multivariable linear regression.**

| Dietary protein intakes<br>( $\text{g}\cdot\text{kg}^{-1}\cdot\text{d}^{-1}$ ) | Changes of bone mineral density at whole body and different sites ( $\text{mg}/\text{cm}^2$ ) |                     |                     |                     |                    |
|--------------------------------------------------------------------------------|-----------------------------------------------------------------------------------------------|---------------------|---------------------|---------------------|--------------------|
|                                                                                | Whole body                                                                                    | Spine L1-4          | Total hip           | Femur neck          | Trochanter         |
| <b><math>\geq 60</math> y (<math>n=876</math>)</b>                             |                                                                                               |                     |                     |                     |                    |
| Total protein                                                                  | 30.55 $\pm$ 36.62                                                                             | -20.75 $\pm$ 31.23  | -5.56 $\pm$ 46.82   | 65.50 $\pm$ 30.23*  | 13.27 $\pm$ 6.09*  |
| Animal protein                                                                 | 56.08 $\pm$ 34.92                                                                             | -35.76 $\pm$ 29.79  | 5.56 $\pm$ 44.70    | 56.11 $\pm$ 28.87*  | 8.09 $\pm$ 5.82    |
| Red-meat protein                                                               | 31.69 $\pm$ 52.05                                                                             | 1.61 $\pm$ 44.40    | -13.37 $\pm$ 66.60  | 42.04 $\pm$ 43.06   | 3.08 $\pm$ 8.67    |
| White-meat protein                                                             | 81.02 $\pm$ 54.82                                                                             | -92.12 $\pm$ 46.70* | 41.33 $\pm$ 70.48   | 98.05 $\pm$ 45.30*  | 13.83 $\pm$ 9.13   |
| Milk and dairy protein                                                         | 195.76 $\pm$ 147.88                                                                           | -9.74 $\pm$ 126.23  | -89.21 $\pm$ 188.76 | 38.09 $\pm$ 122.48  | 24.75 $\pm$ 24.65  |
| Egg protein                                                                    | -36.25 $\pm$ 148.26                                                                           | 25.95 $\pm$ 126.42  | -0.52 $\pm$ 189.28  | -85.82 $\pm$ 122.65 | -5.30 $\pm$ 24.70  |
| Plant protein                                                                  | -66.24 $\pm$ 53.51                                                                            | 39.52 $\pm$ 45.64   | -24.97 $\pm$ 68.49  | 8.37 $\pm$ 44.31    | 9.38 $\pm$ 8.92    |
| Soy protein                                                                    | -125.05 $\pm$ 80.78                                                                           | 50.43 $\pm$ 68.96   | 69.70 $\pm$ 103.40  | -58.59 $\pm$ 66.91  | 4.19 $\pm$ 13.48   |
| <b><math>&lt; 60</math> y (<math>n=1022</math>)</b>                            |                                                                                               |                     |                     |                     |                    |
| Total protein                                                                  | -25.36 $\pm$ 23.40                                                                            | 25.72 $\pm$ 23.70   | 58.85 $\pm$ 40.68   | 67.60 $\pm$ 27.08*  | 23.86 $\pm$ 7.45** |
| Animal protein                                                                 | -28.37 $\pm$ 22.73                                                                            | 11.95 $\pm$ 23.04   | 51.56 $\pm$ 39.57   | 48.44 $\pm$ 26.35   | 15.32 $\pm$ 7.26*  |
| Red-meat protein                                                               | -36.55 $\pm$ 34.99                                                                            | 15.97 $\pm$ 35.45   | 62.61 $\pm$ 60.93   | -8.72 $\pm$ 40.61   | 7.50 $\pm$ 11.19   |
| White-meat protein                                                             | -21.17 $\pm$ 32.98                                                                            | 9.21 $\pm$ 33.41    | 66.29 $\pm$ 57.50   | 80.67 $\pm$ 38.18*  | 23.99 $\pm$ 10.52* |
| Milk and dairy protein                                                         | -35.06 $\pm$ 87.52                                                                            | -12.40 $\pm$ 88.64  | -78.18 $\pm$ 152.10 | 113.66 $\pm$ 101.47 | 5.33 $\pm$ 27.97   |
| Egg protein                                                                    | -9.56 $\pm$ 99.67                                                                             | 31.97 $\pm$ 100.94  | -18.70 $\pm$ 173.34 | 116.52 $\pm$ 115.56 | 7.37 $\pm$ 31.86   |
| Plant protein                                                                  | 12.67 $\pm$ 38.48                                                                             | 35.29 $\pm$ 38.95   | 11.71 $\pm$ 66.94   | 44.03 $\pm$ 44.61   | 20.63 $\pm$ 12.28  |
| Soy protein                                                                    | 85.88 $\pm$ 66.97                                                                             | -27.23 $\pm$ 67.87  | 137.16 $\pm$ 116.39 | 12.94 $\pm$ 77.75   | 15.92 $\pm$ 21.42  |

Data were presented as regression coefficients  $\pm$  standard errors by multivariable linear regression by enter method. Model was adjusted for sex (male or

female), BMI ( $\text{kg}/\text{m}^2$ ), marital status (yes or no), household income ( $\leq 3000$ , 3000-6000 or  $>6000$  yuan $\cdot\text{m}^{-1}\cdot\text{p}^{-1}$ ), smoking (yes or no), alcohol drinking (yes or no), total physical activity ( $\text{Met}\cdot\text{wk}^{-1}$ ), calcium supplement usage (yes or no), multi-vitamin usage (yes or no), daily dietary energy intake ( $\text{kcal}/\text{d}$ ), dietary Vitamin D intake ( $\text{ug}/\text{d}$ ) and calcium intake ( $\text{mg}/\text{d}$ ). Changes of BMD =  $[(\text{BMD at 2nd follow-up} - \text{BMD at 1st follow-up}) \times 3] / \text{time interval}$ . \* $p < 0.05$ , \*\* $p < 0.01$ , \*\*\* $p < 0.001$

**Supplemental Table S5. Subgroup analyses by Body mass index (BMI,  $\geq 24.0$  vs.  $< 24.0$  kg/m<sup>2</sup>) for the associations of various dietary protein intake with the changes of BMD (mg/cm<sup>2</sup>) by multivariable linear regression.**

| Dietary protein intakes<br>(g·kg <sup>-1</sup> ·d <sup>-1</sup> )                | Changes of bone mineral density at whole body and different sites (mg/cm <sup>2</sup> ) |                     |                      |                     |                    |
|----------------------------------------------------------------------------------|-----------------------------------------------------------------------------------------|---------------------|----------------------|---------------------|--------------------|
|                                                                                  | Whole body                                                                              | Spine L1-4          | Total hip            | Femur neck          | Trochanter         |
| <b>BMI<math>\geq 24.0</math> kg/m<sup>2</sup> (n=826)</b>                        |                                                                                         |                     |                      |                     |                    |
| Total protein                                                                    | 18.98 $\pm$ 36.29                                                                       | -32.98 $\pm$ 32.52  | 32.25 $\pm$ 48.78    | 47.46 $\pm$ 33.33   | 7.30 $\pm$ 7.42    |
| Animal protein                                                                   | 44.85 $\pm$ 35.21                                                                       | -30.58 $\pm$ 31.58  | 26.41 $\pm$ 47.28    | 40.69 $\pm$ 32.37   | 3.39 $\pm$ 7.21    |
| Red-meat protein                                                                 | 91.25 $\pm$ 55.25                                                                       | -4.97 $\pm$ 49.62   | -5.21 $\pm$ 74.25    | 13.62 $\pm$ 50.87   | -1.62 $\pm$ 11.32  |
| White-meat protein                                                               | -1.19 $\pm$ 56.16                                                                       | -82.16 $\pm$ 50.26  | 90.32 $\pm$ 75.29    | 88.29 $\pm$ 51.53   | 11.13 $\pm$ 11.48  |
| Milk and dairy protein                                                           | 134.48 $\pm$ 155.95                                                                     | 72.62 $\pm$ 139.85  | 69.94 $\pm$ 209.24   | 60.34 $\pm$ 143.41  | 4.26 $\pm$ 31.92   |
| Egg protein                                                                      | 35.27 $\pm$ 173.88                                                                      | 2.02 $\pm$ 155.89   | -258.50 $\pm$ 233.12 | -65.38 $\pm$ 159.83 | -13.49 $\pm$ 35.57 |
| Plant protein                                                                    | -69.00 $\pm$ 56.33                                                                      | -1.29 $\pm$ 50.55   | 9.93 $\pm$ 75.61     | 10.38 $\pm$ 51.83   | 8.94 $\pm$ 11.53   |
| Soy protein                                                                      | -173.32 $\pm$ 98.09                                                                     | 37.75 $\pm$ 88.11   | 37.80 $\pm$ 132.11   | -48.10 $\pm$ 90.34  | -3.54 $\pm$ 20.11  |
| <b>18.5<math>\leq</math> BMI<math>&lt; 24.0</math> kg/m<sup>2</sup> (n=1083)</b> |                                                                                         |                     |                      |                     |                    |
| Total protein                                                                    | -48.57 $\pm$ 24.11*                                                                     | 61.42 $\pm$ 22.80** | 66.99 $\pm$ 38.75    | 70.78 $\pm$ 24.64** | 17.27 $\pm$ 6.42** |
| Animal protein                                                                   | -40.04 $\pm$ 24.98                                                                      | 35.51 $\pm$ 23.66   | 77.80 $\pm$ 40.19    | 53.85 $\pm$ 25.56*  | 12.47 $\pm$ 6.66   |
| Red-meat protein                                                                 | -95.48 $\pm$ 38.11*                                                                     | 63.30 $\pm$ 36.14   | 68.08 $\pm$ 61.58    | -18.82 $\pm$ 39.14  | 2.76 $\pm$ 10.20   |
| White-meat protein                                                               | 8.57 $\pm$ 36.13                                                                        | 16.39 $\pm$ 34.21   | 91.92 $\pm$ 58.25    | 95.92 $\pm$ 36.87** | 21.75 $\pm$ 9.61*  |
| Milk and dairy protein                                                           | -68.62 $\pm$ 97.19                                                                      | 18.19 $\pm$ 92.05   | -20.54 $\pm$ 156.00  | 129.77 $\pm$ 99.45  | 16.02 $\pm$ 25.93  |
| Egg protein                                                                      | 20.27 $\pm$ 99.32                                                                       | -10.25 $\pm$ 94.04  | 98.93 $\pm$ 159.53   | 115.65 $\pm$ 101.63 | -3.03 $\pm$ 26.49  |
| Plant protein                                                                    | -28.32 $\pm$ 38.38                                                                      | 71.39 $\pm$ 36.28   | -13.40 $\pm$ 61.75   | 51.86 $\pm$ 39.27   | 14.21 $\pm$ 10.23  |
| Soy protein                                                                      | 49.76 $\pm$ 63.05                                                                       | -29.19 $\pm$ 59.71  | 61.39 $\pm$ 101.26   | 2.37 $\pm$ 64.58    | 8.96 $\pm$ 16.82   |



Data were presented as regression coefficients  $\pm$  standard errors by multivariable linear regression. Model was adjusted for age (y), sex (male or female), marital status (yes or no), household income ( $\leq 3000$ , 3000-6000 or  $>6000$  yuan·m<sup>-1</sup>·p<sup>-1</sup>), smoking (yes or no), alcohol drinking (yes or no), total physical activity (Met·wk<sup>-1</sup>), calcium supplement usage (yes or no), multi-vitamin usage (yes or no), daily dietary energy intake (kcal/d), dietary Vitamin D intake (ug/d) and calcium intake (mg/d). Changes of BMD =[(BMD at 2nd follow-up – BMD at 1st follow-up)×3] / time interval. \* $p < 0.05$ , \*\* $p < 0.01$ , \*\*\* $p < 0.001$

**Supplemental Table S6. Subgroup analyses by high and low levels of dietary calcium intake for the associations of various dietary protein intake with the changes of BMD (mg/cm<sup>2</sup>) by multivariable linear regression analyses.**

| Dietary protein intakes<br>(g·kg <sup>-1</sup> ·d <sup>-1</sup> ) | Changes of bone mineral density at whole body and different sites (mg/cm <sup>2</sup> ) |               |               |                |               |
|-------------------------------------------------------------------|-----------------------------------------------------------------------------------------|---------------|---------------|----------------|---------------|
|                                                                   | Whole body                                                                              | Spine L1-4    | Total hip     | Femur neck     | Trochanter    |
| <b>≥50.00% RNI (n=958)</b>                                        |                                                                                         |               |               |                |               |
| Total protein                                                     | 8.10±30.39                                                                              | 1.28±26.92    | -9.56±43.07   | 70.18±27.24**  | 16.67±6.04**  |
| Animal protein                                                    | 37.93±28.85                                                                             | -17.36±25.57  | 0.00±40.93    | 67.21±25.87**  | 10.86±5.75    |
| Red-meat protein                                                  | 2.46±46.10                                                                              | 32.83±40.81   | -29.49±65.43  | -22.62±41.45   | 11.91±9.19    |
| White-meat protein                                                | 38.81±39.31                                                                             | -48.93±34.80  | 22.76±56.00   | 91.79±35.25**  | 9.25±7.84     |
| Milk and dairy protein                                            | 93.08±77.87                                                                             | -29.92±69.02  | -9.27±110.42  | 125.65±69.97   | 17.20±15.54   |
| Egg protein                                                       | 58.49±121.97                                                                            | 4.09±108.04   | 11.68±172.96  | 167.33±109.58  | -20.79±24.32  |
| Plant protein                                                     | -75.55±45.28                                                                            | 45.69±40.14   | -21.33±64.33  | -9.56±40.79    | 10.34±9.04    |
| Soy protein                                                       | -85.78±64.13                                                                            | 61.73±56.82   | 102.78±90.98  | -25.01±57.73   | 1.40±12.81    |
| <b>&lt;50.00%RNI (N=1029)</b>                                     |                                                                                         |               |               |                |               |
| Total protein                                                     | -2.46±28.20                                                                             | 11.87±26.92   | 67.89±42.49   | 68.00±28.88*   | 19.61±7.51**  |
| Animal protein                                                    | -7.12±27.88                                                                             | 2.71±26.62    | 67.98±42.04   | 40.42±28.61    | 13.01±7.44    |
| Red-meat protein                                                  | -13.00±40.29                                                                            | 0.80±38.47    | 56.76±60.76   | 44.43±41.36    | 1.43±10.77    |
| White-meat protein                                                | 9.02±48.24                                                                              | 0.74±46.06    | 137.15±72.63  | 90.77±49.46    | 37.91±12.84** |
| Milk and dairy protein                                            | -0.18±147.44                                                                            | -21.19±140.76 | -50.41±222.13 | -110.59±151.39 | -28.58±39.41  |
| Egg protein                                                       | -78.63±125.13                                                                           | 57.30±119.48  | -67.25±188.70 | -145.55±128.46 | 13.73±33.46   |
| Plant protein                                                     | 13.48±47.13                                                                             | 25.40±45.00   | -4.26±71.16   | 74.46±48.35    | 17.61±12.59   |
| Soy protein                                                       | 59.11±93.98                                                                             | -73.84±89.71  | 66.52±141.81  | -22.97±96.54   | 23.96±25.12   |

Data were presented as regression coefficients ± standard errors by multivariable linear regression. Model was adjusted for age (y), sex (male or female), BMI

(kg/m<sup>2</sup>), marital status (yes or no), household income ( $\leq 3000$ , 3000-6000 or  $>6000$  yuan·m<sup>-1</sup>·p<sup>-1</sup>), smoking (yes or no), alcohol drinking (yes or no), total physical activity (Met·wk<sup>-1</sup>), calcium supplement usage (yes or no), multi-vitamin usage (yes or no), dietary energy intake (kcal/d), dietary Vitamin D intake (ug/d). Changes of BMD =[(BMD at 2nd follow-up – BMD at 1st follow- up)×3] / time interval. RNI, recommended nutrients intake by Chinese Nutrition Society; \* $p < 0.05$ , \*\* $p < 0.01$ , \*\*\* $p < 0.001$

**Supplemental Table S7. Replacing red meat protein with white meat protein by multivariable-adjusted substitution analyses.**

| Replacement of red meat protein<br>intake with white meat protein<br>intake, g·kg <sup>-1</sup> ·d <sup>-1</sup> | Changes of bone mineral density at different sites (mg/cm <sup>2</sup> ) |       |              |        |             |       |             |       |             |       |
|------------------------------------------------------------------------------------------------------------------|--------------------------------------------------------------------------|-------|--------------|--------|-------------|-------|-------------|-------|-------------|-------|
|                                                                                                                  | Whole body                                                               |       | Spine L1-4   |        | Total hip   |       | Femur neck  |       | Trochanter  |       |
|                                                                                                                  | B±SE                                                                     | β     | B±SE         | β      | B±SE        | β     | B±SE        | β     | B±SE        | β     |
| Original model (no substitution)                                                                                 |                                                                          |       |              |        |             |       |             |       |             |       |
| Model I                                                                                                          | 22.93±40.32                                                              | 0.018 | -40.46±37.11 | -0.035 | 55.34±59.17 | 0.030 | 64.49±38.80 | 0.053 | 13.89±9.48  | 0.047 |
| Leave-one-out model                                                                                              |                                                                          |       |              |        |             |       |             |       |             |       |
| Model II (substation model)                                                                                      | 33.67±44.62                                                              | 0.027 | -47.28±41.07 | -0.041 | 35.01±65.43 | 0.019 | 82.86±42.92 | 0.069 | 15.87±10.49 | 0.054 |

Model I was the original multivariable adjusted linear regression model. The variables included in the models were white meat protein intake (g·kg<sup>-1</sup>·d<sup>-1</sup>), animal protein intake (g·kg<sup>-1</sup>·d<sup>-1</sup>), age (y), sex (male or female), BMI (kg/m<sup>2</sup>), marital status (yes or no), household income (≤3000, 3000-6000 or >6000 yuan·m<sup>-1</sup>·p<sup>-1</sup>), smoking (yes or no), alcohol drinking (yes or no), total physical activity (Met·wk<sup>-1</sup>), calcium supplement usage (yes or no), multi-vitamin usage (yes or no), daily dietary energy intake (kcal/d), dietary Vitamin D intake (μg/d) and calcium intake (mg/d).

Model II was the model used for substitution analyses by Leave-one-out method which included an additional variable (the other sources of animal protein, g·kg<sup>-1</sup>·d<sup>-1</sup>, protein from egg and dairy etc.) on the basis of Model I.

B denoted the coefficient of white meat protein intake(g·kg<sup>-1</sup>·d<sup>-1</sup>) in multivariable linear regression model; SE denoted standard error; β was the standardized coefficient for white meat protein intake(g·kg<sup>-1</sup>·d<sup>-1</sup>) in multivariable linear regression model.
